# Supplementary material for: Intrinsic effects of electrolytes on lithium metal deposition and dissolution investigated through a separator-free cell
Source: Royal Society of Chemistry journal article supplement (doi:10.1039/d4ya00245h), 2024-01-01
Supplement: d4ya00245h1.pdf [file d4ya00245h1.pdf]

Electronic Supplementary Information

## **Intrinsic effects of electrolytes on lithium metal deposition and dissolution investigated through a separator-free cell**

Tomoki Takahashi,<sup>†</sup> Di Wang,<sup>†</sup> Jinkwang Hwang\* and Kazuhiko Matsumoto\*

Graduate School of Energy Science, Kyoto University, Sakyo-ku, Kyoto 606-8501, Japan

<sup>†</sup>Equal contribution

\*Corresponding author:

KM (matsumoto.kazuhiko.4c@kyoto-u.ac.jp)

JH (hwang.jinkwang.5c@kyoto-u.ac.jp)

**Table S1** List of the electrolytes used in this study.

| Salt                 | Concentration | Solvent                                   | Additive                |
|----------------------|---------------|-------------------------------------------|-------------------------|
| Li[PF <sub>6</sub> ] | 1 M           | SL                                        |                         |
| Li[PF <sub>6</sub> ] | 1 M           | TMP                                       |                         |
| Li[PF <sub>6</sub> ] | 1 M           | TEP                                       |                         |
| Li[PF <sub>6</sub> ] | 1 M           | DMC                                       |                         |
| Li[PF <sub>6</sub> ] | 1 M           | PC                                        |                         |
| Li[PF <sub>6</sub> ] | 1 M           | EC:DMC                                    |                         |
| Li[PF <sub>6</sub> ] | 1 M           | EC:DMC                                    | 3 wt% FEC               |
| Li[PF <sub>6</sub> ] | 1 M           | AN                                        |                         |
| Li[PF <sub>6</sub> ] | 1 M           | DMSO                                      |                         |
| Li[PF <sub>6</sub> ] | 1 M           | G2                                        |                         |
| Li[PF <sub>6</sub> ] | 1 M           | DME                                       |                         |
| Li[FSA]              | 1 M           | SL                                        |                         |
| Li[FSA]              | 1 M           | TMP                                       |                         |
| Li[FSA]              | 1 M           | TEP                                       |                         |
| Li[FSA]              | 1 M           | DMC                                       |                         |
| Li[FSA]              | 1 M           | PC                                        |                         |
| Li[FSA]              | 1 M           | PC                                        | 3 wt% FEC               |
| Li[FSA]              | 4 M           | PC                                        |                         |
| Li[FSA]              | 4 M           | PC                                        | 3 wt% FEC               |
| Li[FSA]              | 1 M           | EC:DMC                                    |                         |
| Li[FSA]              | 1 M           | EC:DMC                                    | 3 wt% FEC               |
| Li[FSA]              | 4 M           | EC:DMC                                    |                         |
| Li[FSA]              | 4 M           | EC:DMC                                    | 3 wt% FEC               |
| Li[FSA]              | 1 M           | AN                                        |                         |
| Li[FSA]              | 1 M           | DMSO                                      |                         |
| Li[FSA]              | 1 M           | G2                                        |                         |
| Li[FSA]              | 1 M           | DME                                       |                         |
| Li[FSA]              | 1 M           | DME                                       | 3 wt% LiNO <sub>3</sub> |
| Li[FSA]              | 4 M           | DME                                       |                         |
| Li[FSA]              | 20 mol%       | [C <sub>3</sub> C <sub>1</sub> pyrr][FSA] |                         |
| Li[FSA]              | 40 mol%       | [C <sub>3</sub> C <sub>1</sub> pyrr][FSA] |                         |
| Li[FSA]              | 20 mol%       | [C <sub>2</sub> C <sub>1</sub> im][FSA]   |                         |
| Li[FSA]              | 40 mol%       | [C <sub>2</sub> C <sub>1</sub> im][FSA]   |                         |
| Li[TFSA]             | 1 M           | SL                                        |                         |
| Li[TFSA]             | 1 M           | TMP                                       |                         |
| Li[TFSA]             | 1 M           | TEP                                       |                         |

---

|          |           |                                            |                         |
|----------|-----------|--------------------------------------------|-------------------------|
| Li[TFSA] | 1 M       | DMC                                        |                         |
| Li[TFSA] | 1 M       | PC                                         |                         |
| Li[TFSA] | 1 M       | EC:DMC                                     |                         |
| Li[TFSA] | 1 M       | EC:DMC                                     | 3 wt% FEC               |
| Li[TFSA] | 1 M       | AN                                         |                         |
| Li[TFSA] | 1 M       | DMSO                                       |                         |
| Li[TFSA] | 1 M       | G2                                         |                         |
| Li[TFSA] | 1 M       | DME                                        |                         |
| Li[TFSA] | 1 M       | DME                                        | 3 wt% LiNO <sub>3</sub> |
| Li[TFSA] | Saturated | DME                                        |                         |
| Li[TFSA] | 20 mol%   | [C <sub>3</sub> C <sub>1</sub> pyrr][TFSA] |                         |
| Li[TFSA] | 20 mol%   | [C <sub>2</sub> C <sub>1</sub> im][TFSA]   |                         |

---

(a) 1 M Li[PF<sub>6</sub>]-SL

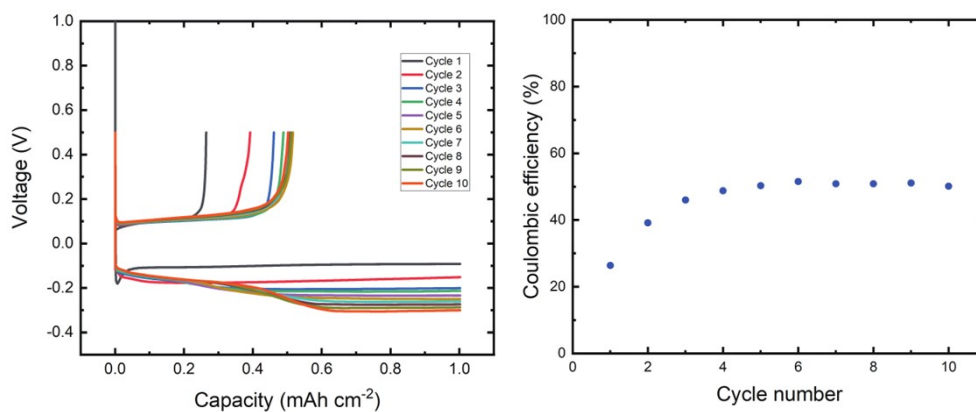

(b) 1 M Li[PF<sub>6</sub>]-TMP

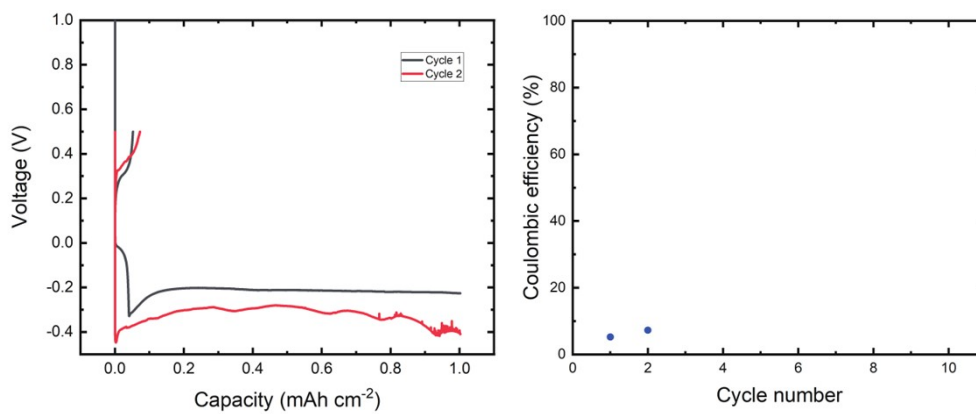

(c) 1 M Li[PF<sub>6</sub>]-PC

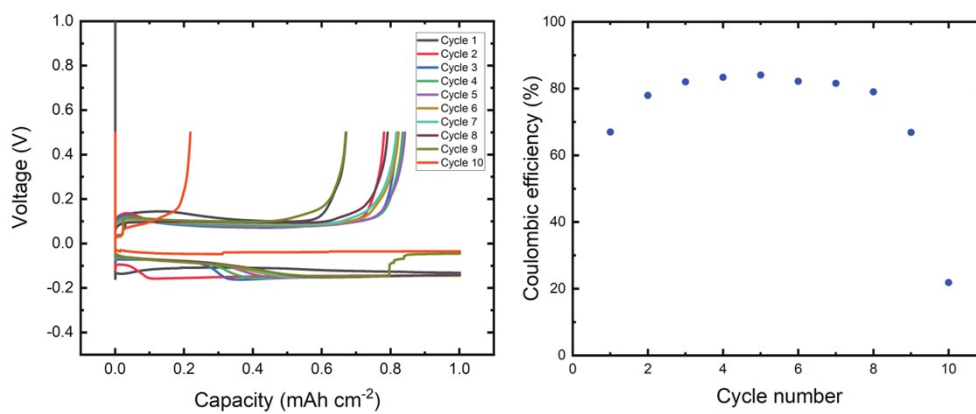

**Fig. S1** Summary of the Li metal deposition/dissolution tests in the Li[PF<sub>6</sub>]-based electrolytes. (left) voltage profiles and (right) CE.

(d) 1 M Li[PF<sub>6</sub>]-EC:DMC

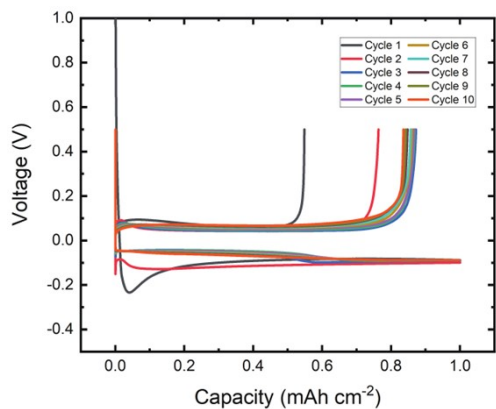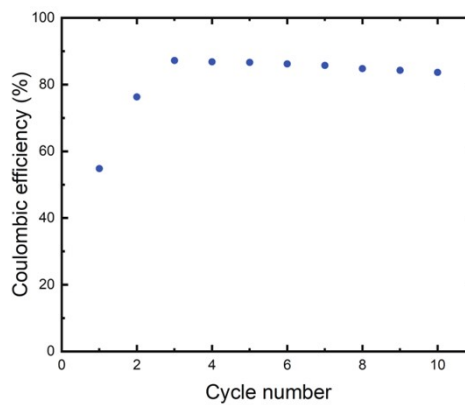

(e) 1 M Li[PF<sub>6</sub>]-EC:DMC 3 wt% FEC

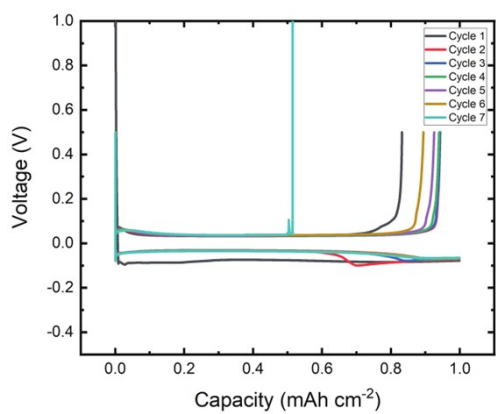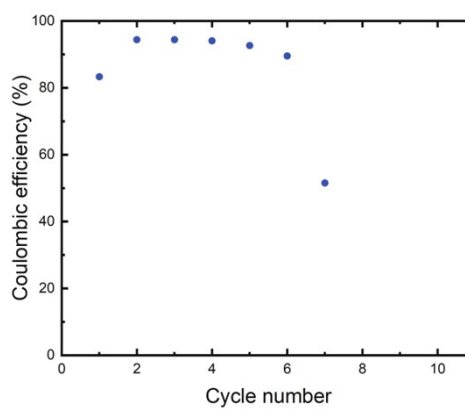

(f) 1 M Li[PF<sub>6</sub>]-DMSO

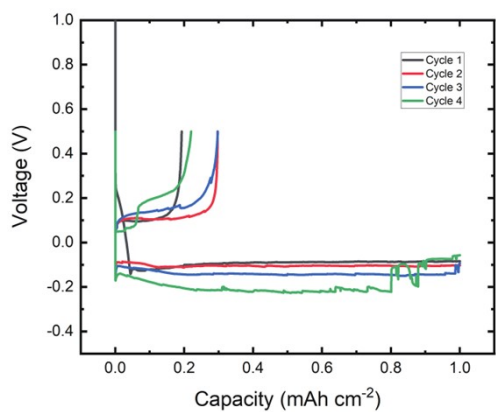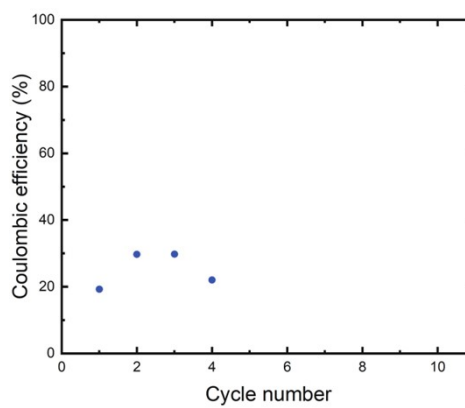

Fig. S1 (cont.)

(a) 1 M Li[FSA]-SL

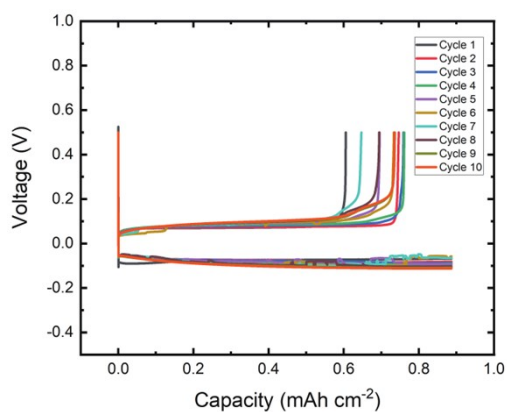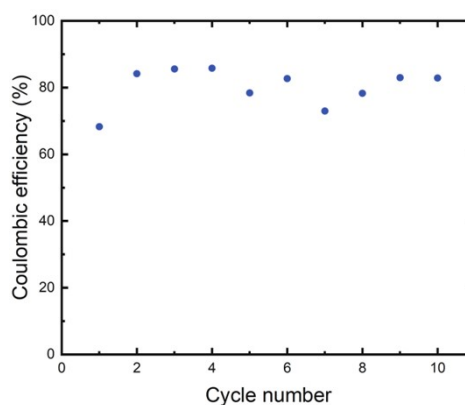

(b) 1 M Li[FSA]-DMC

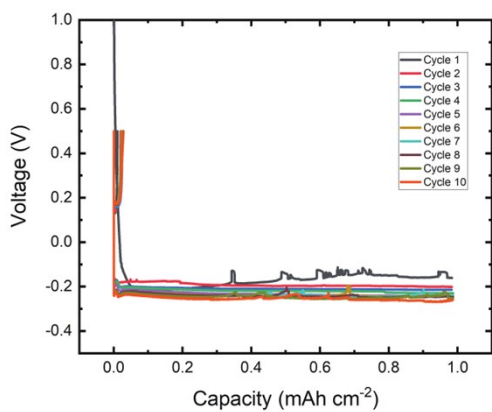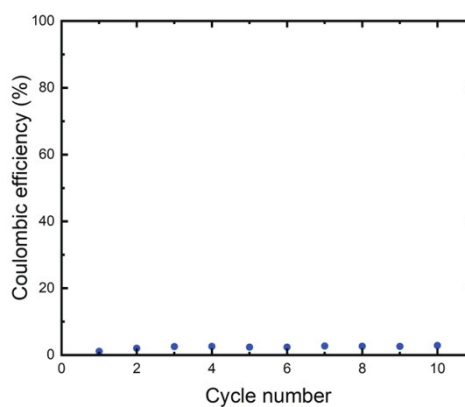

(c) 1 M Li[FSA]-PC

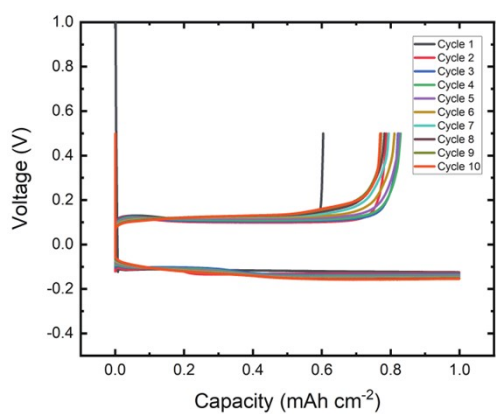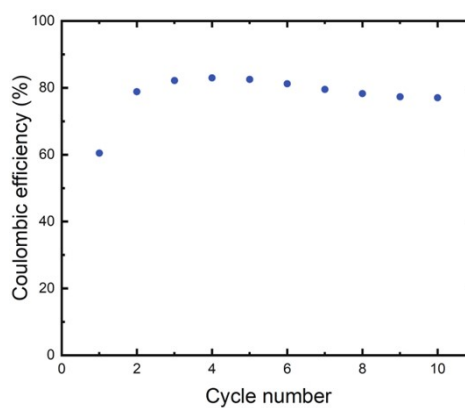

**Fig. S2** Summary of the Li metal deposition/dissolution tests in the Li[FSA]-based electrolytes. (left) voltage profiles and (right) CE.

(d) 1 M Li[FSA]-PC 3 wt% FEC

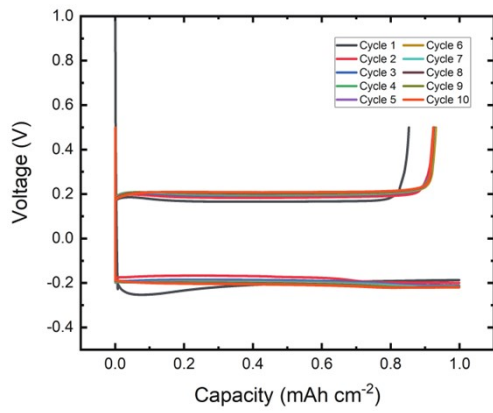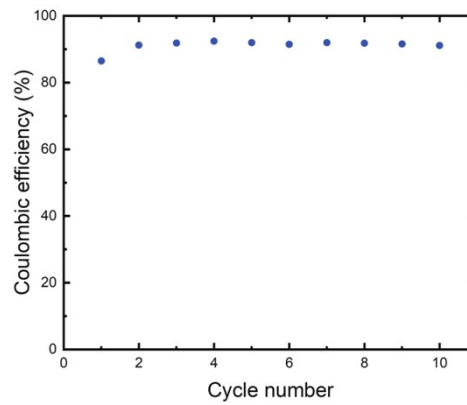

(e) 4 M Li[FSA]-PC

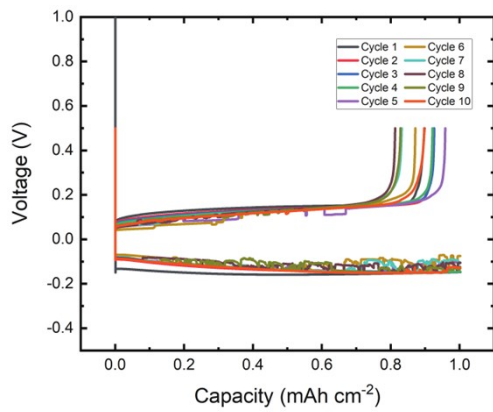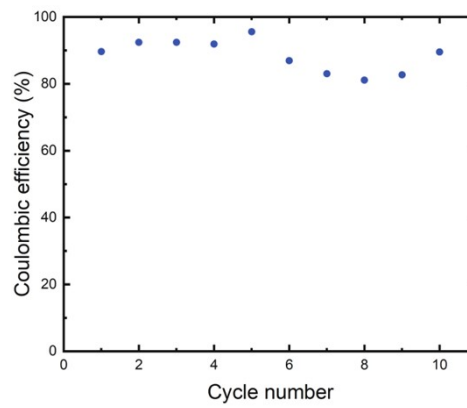

(f) 4 M Li[FSA]-PC 3 wt% FEC

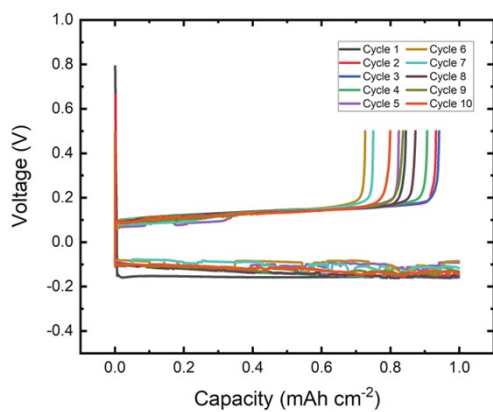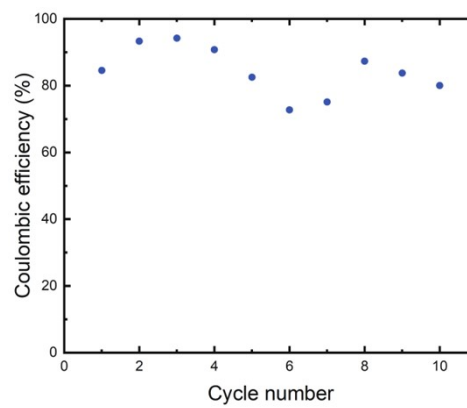

Fig. S2 (cont.)

(g) 1 M Li[FSA]-EC:DMC

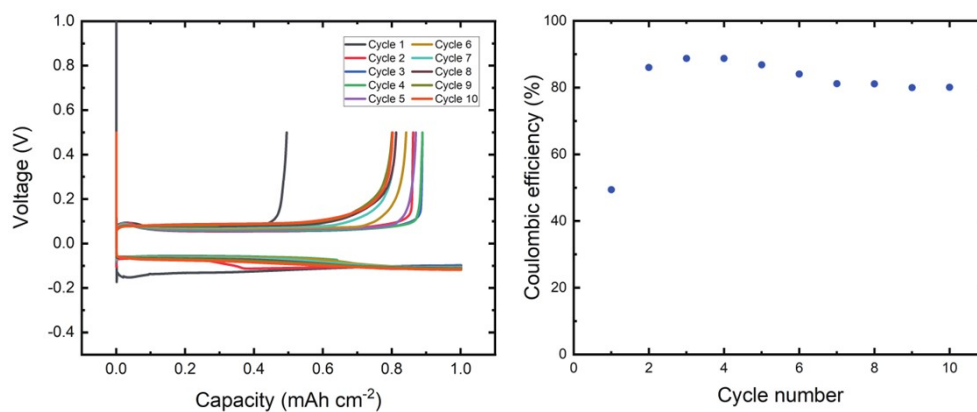

(h) 1 M Li[FSA]-EC:DMC 3 wt% FEC

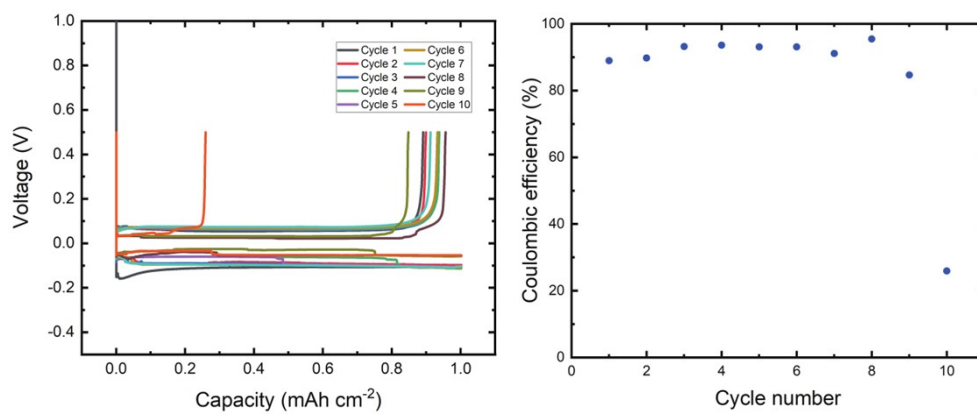

(i) 4 M Li[FSA]-EC:DMC

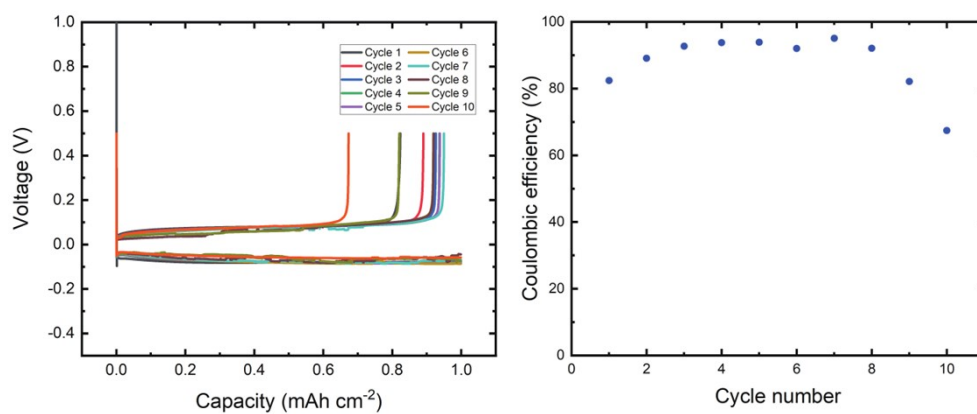

Fig. S2 (cont.)



(j) 4 M Li[FSA]-EC:DMC 3 wt% FEC

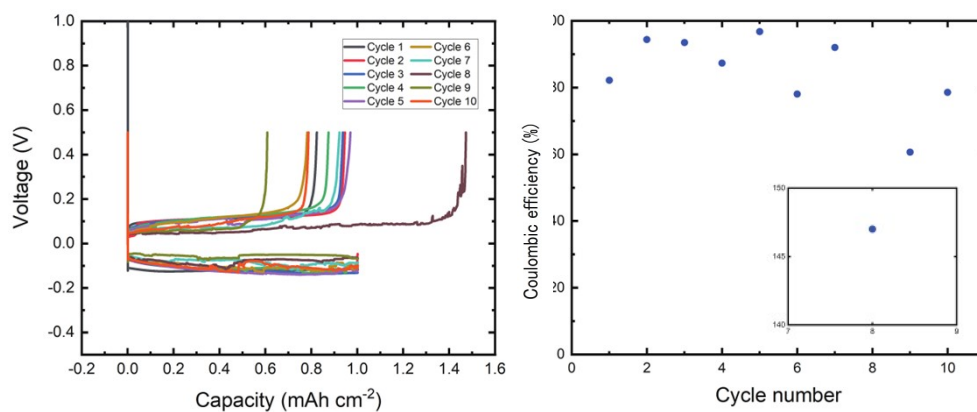

(k) 1 M Li[FSA]-DMSO

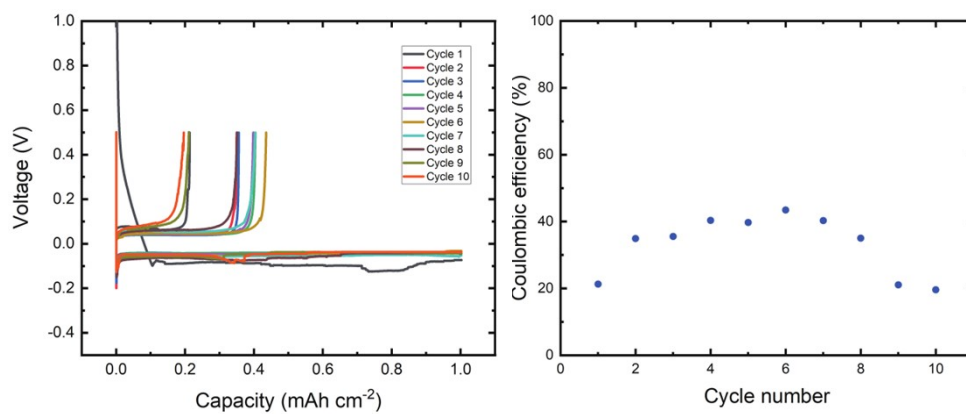

(l) 1 M Li[FSA]-DME

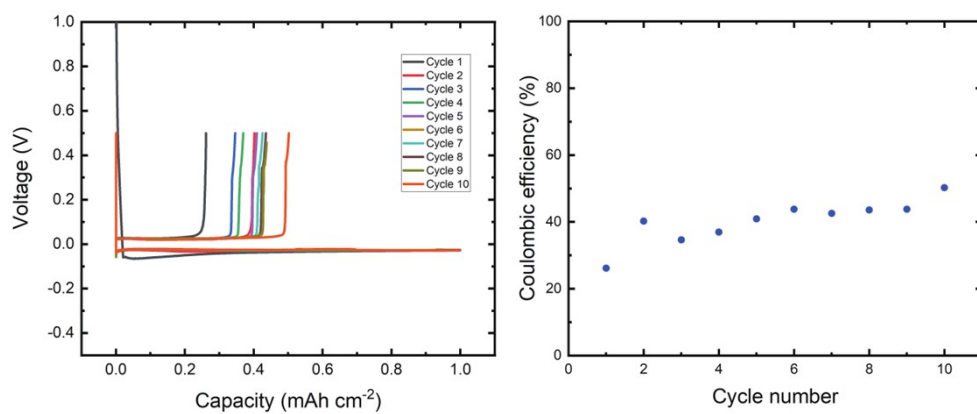

Fig. S2 (cont.)

(m) 1 M Li[FSA]-DME 3 wt% LiNO<sub>3</sub>

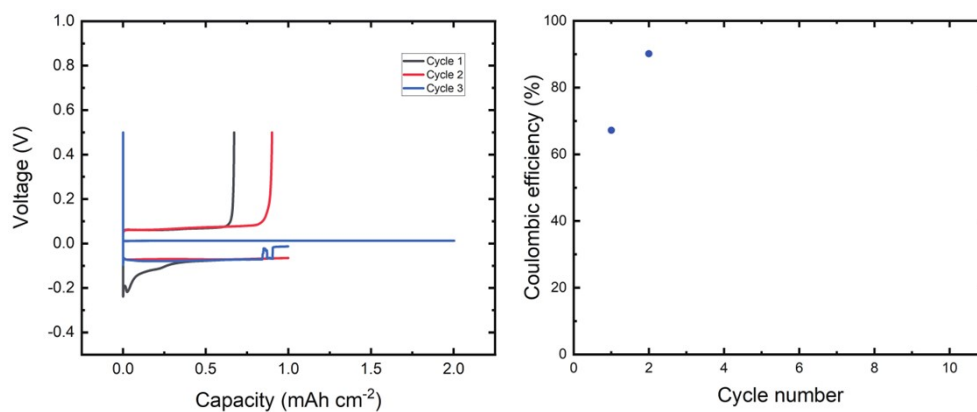

(n) 4 M Li[FSA]-DME

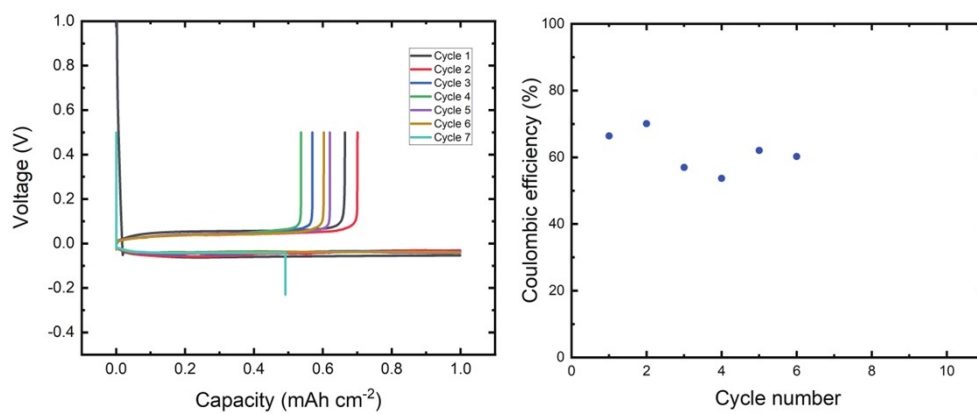

(o) 20 mol% Li[FSA]-[C<sub>3</sub>C<sub>1</sub>pyrr][FSA]

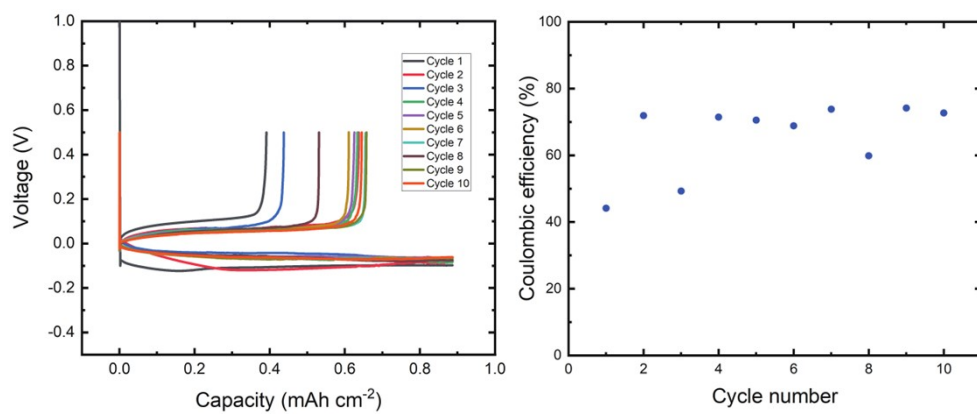

Fig. S2 (cont.)

(p) 40 mol% Li[FSA]-[C<sub>3</sub>C<sub>1</sub>pyrr][FSA]

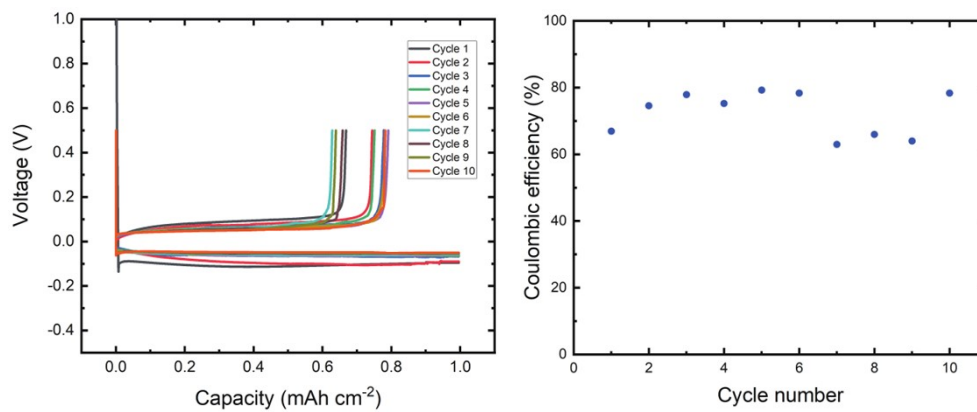

(q) 20 mol% Li[FSA]-[C<sub>2</sub>C<sub>1</sub>im][FSA]

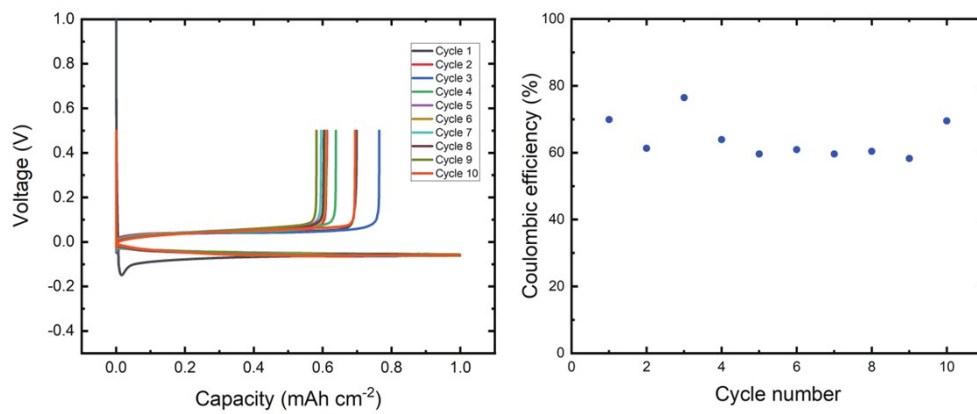

(r) 40 mol% Li[FSA]-[C<sub>2</sub>C<sub>1</sub>im][FSA]

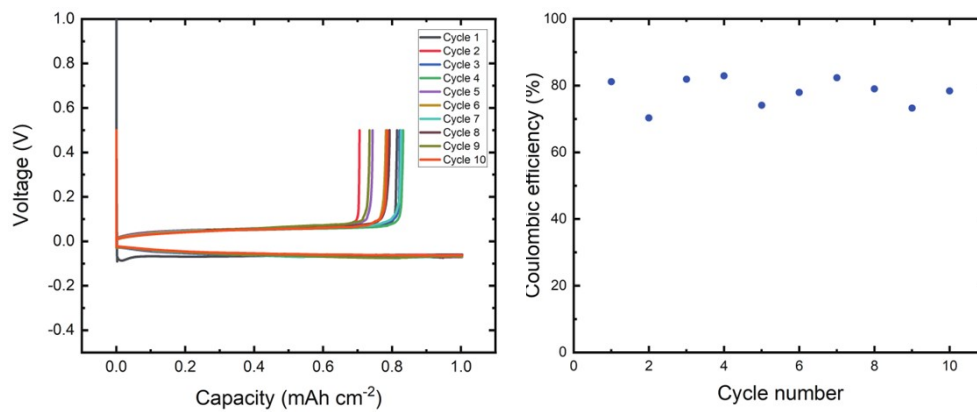

Fig. S2 (cont.)

(a) 1 M Li[TFSA]-SL

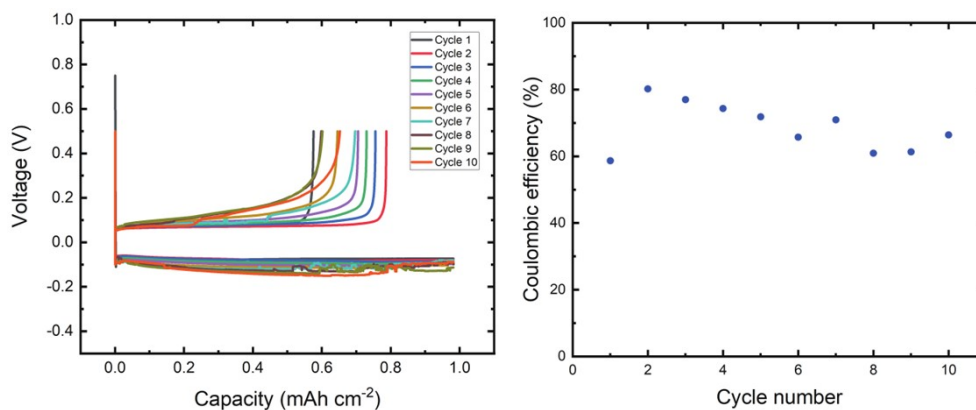

(b) 1 M Li[TFSA]-TEP

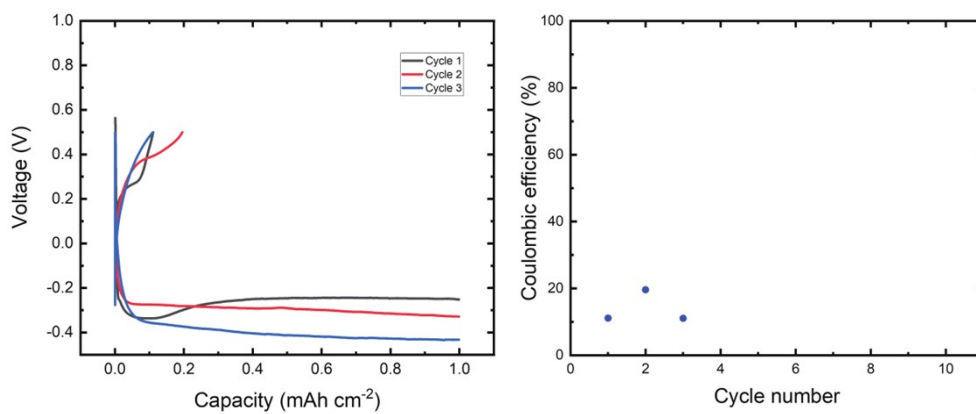

(c) 1 M Li[TFSA]-DMC

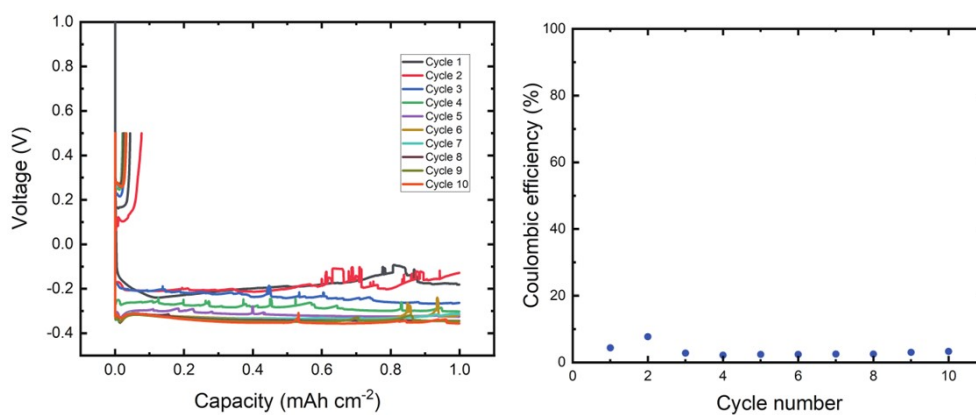

**Fig. S3** Summary of the Li metal deposition/dissolution tests in the Li[TFSA]-based electrolytes. (left) voltage profiles and (right) CE.

(d) 1 M Li[TFSA]-PC

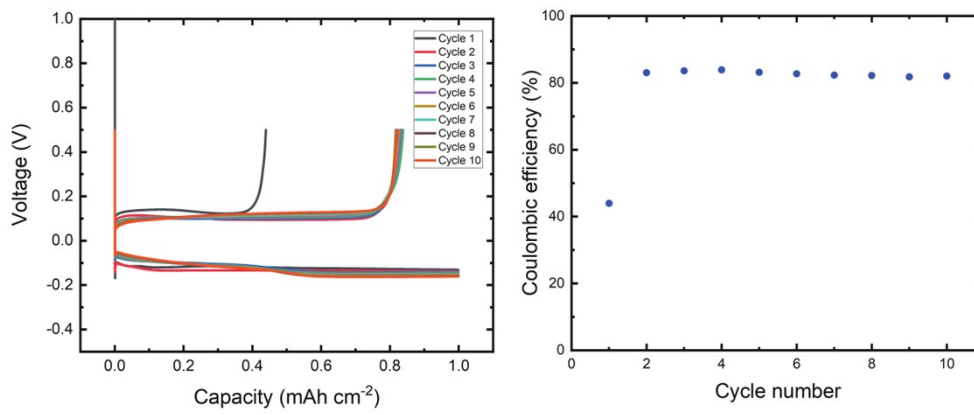

(e) 1 M Li[TFSA]-EC:DMC

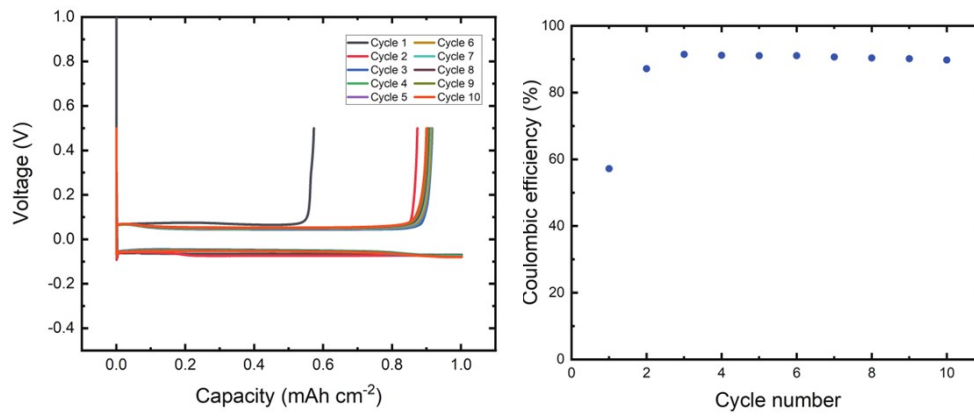

(f) 1 M Li[TFSA]-EC:DMC 3 wt% FEC

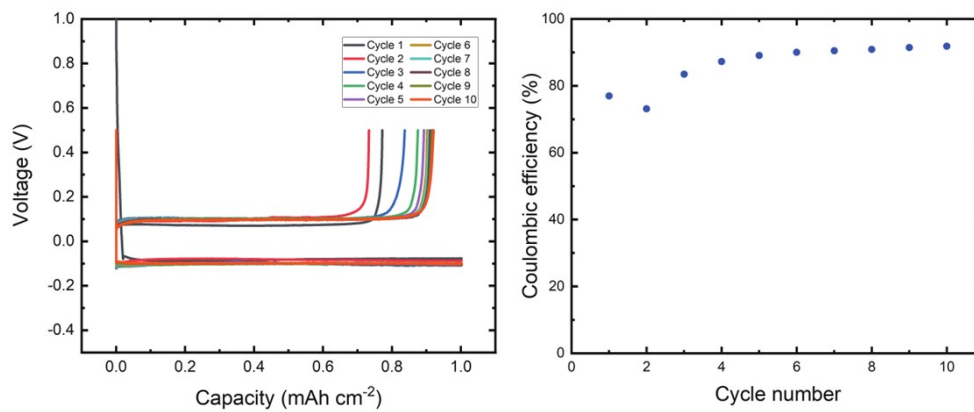

Fig.S3 (cont.)

(g) 1 M Li[TFSA]-G2

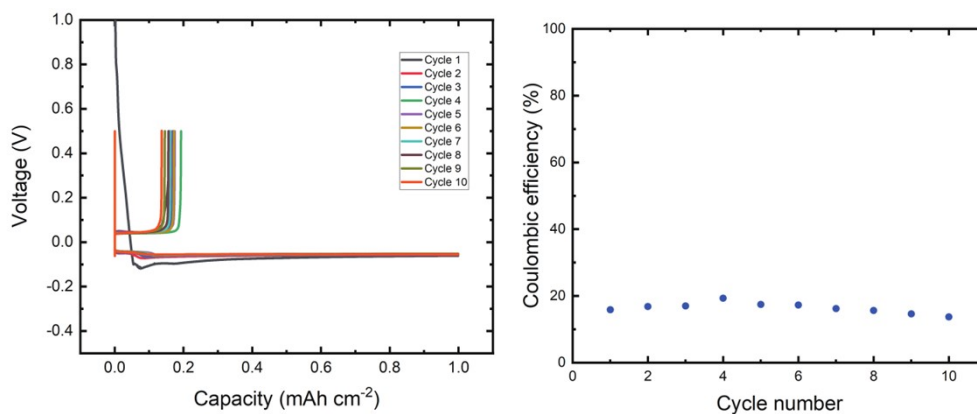

(h) 1 M Li[TFSA]-DME

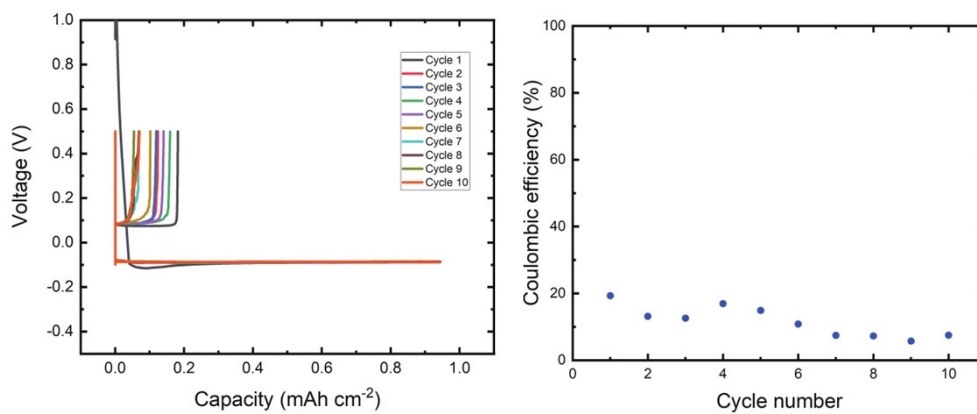

(i) 1 M Li[TFSA]-DME 3 wt% LiNO<sub>3</sub>

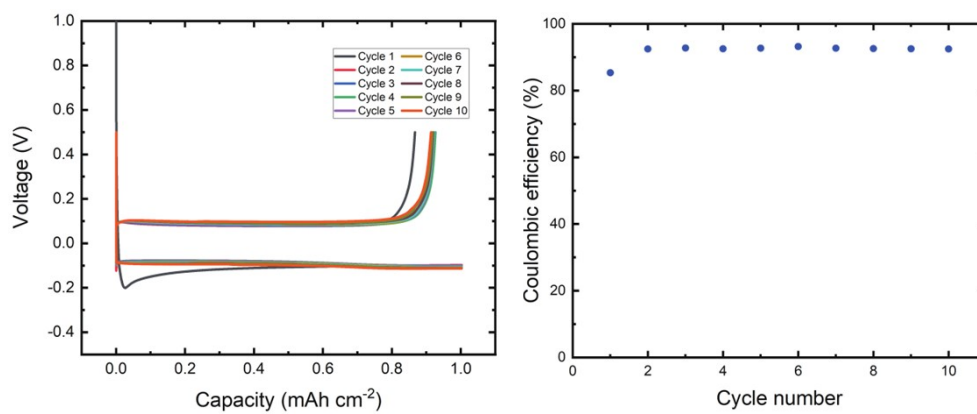

Fig. S3 (cont.)

(j) Saturated Li[TFSA]-DME

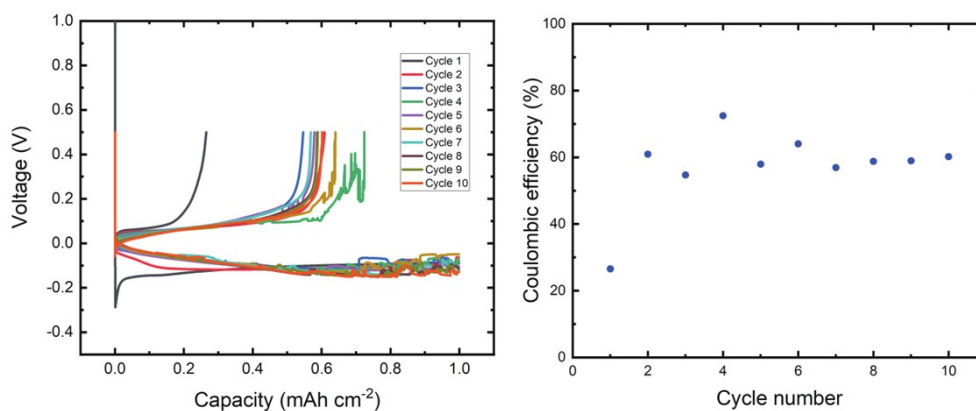

(k) 20 mol% Li[TFSA]-[C<sub>3</sub>C<sub>1</sub>pyrr][TFSA]

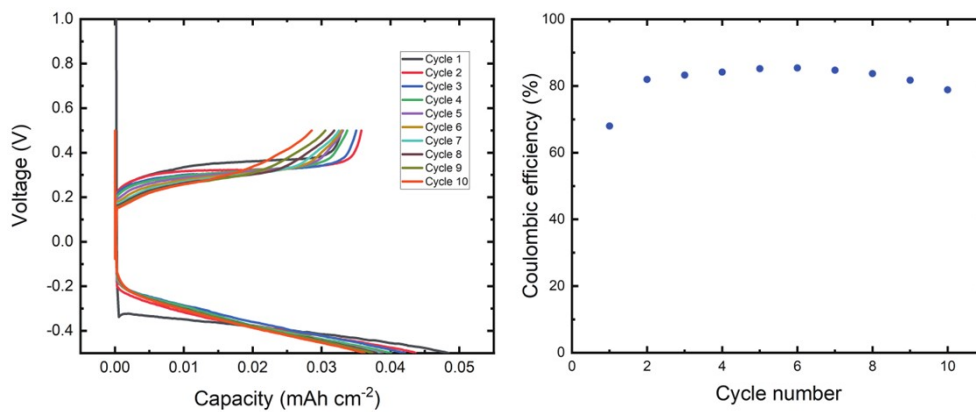

(l) 20 mol% Li[TFSA]-[C<sub>2</sub>C<sub>1</sub>im][TFSA]

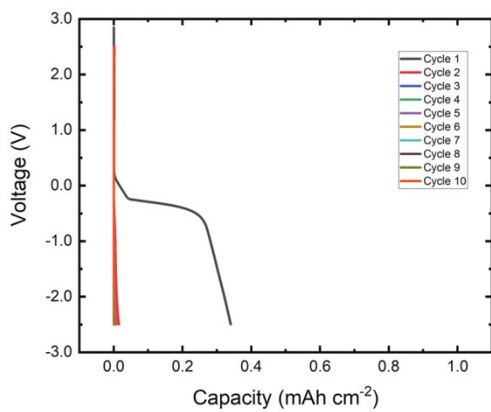

Fig. S3 (cont.)

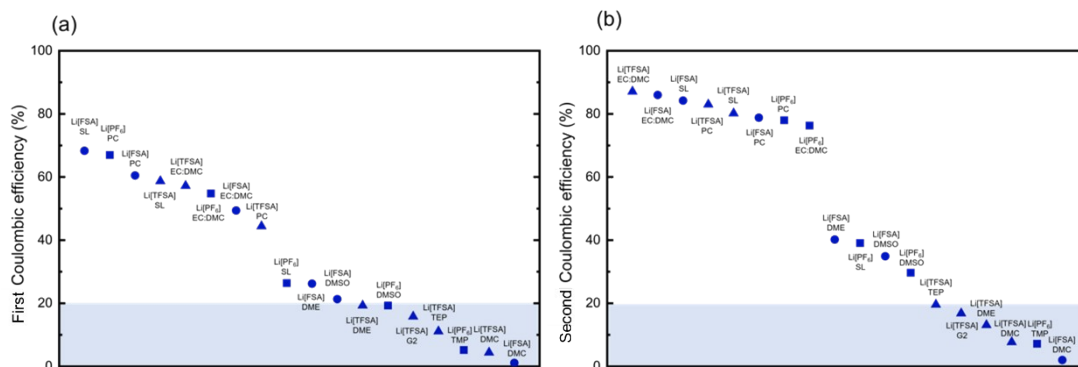

**Fig. S4** CE of lithium deposition/dissolution test for 1 M electrolytes without additives in the separator-free cell (Li/Cu). (a) the first and (b) the second cycles. The colored areas indicate CE less than 20%. Square, circle, and triangle symbols indicate Li[PF<sub>6</sub>]-, Li[FSA]- based electrolytes, triangle symbols indicate Li[TFSA] based electrolyte, Blue color indicates the concentration of 1 M electrolytes and red color does the high concentrations of 4 M, 40 mol%, or saturated electrolytes. Filled and unfilled symbols denote the absence and presence of additives, respectively.



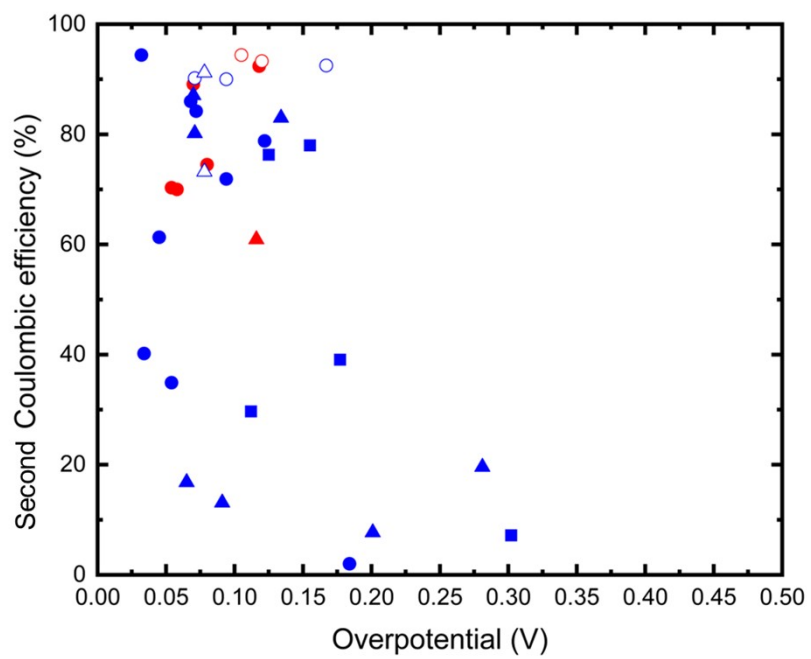

**Fig. S4** Correlation plots of overpotential at 0.2 mA h cm<sup>-2</sup> and CE in the second cycle.

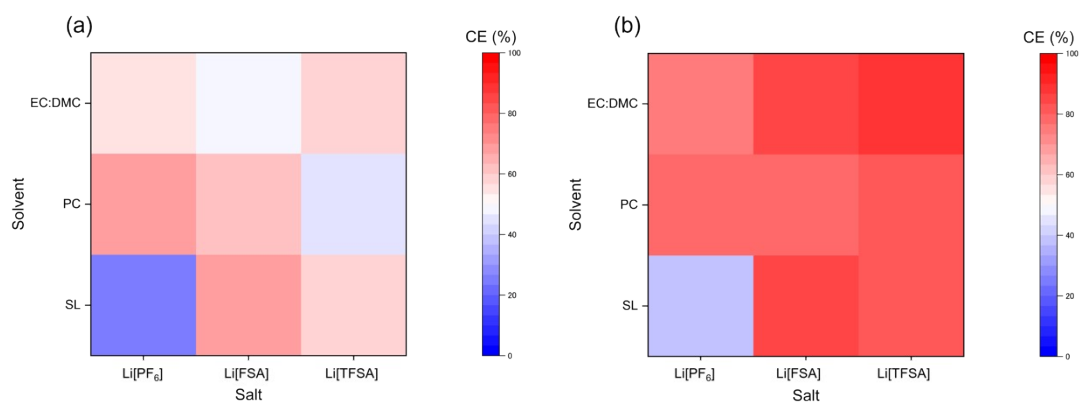

**Fig. S5** Heatmaps of the CE for electrolytes using Li[PF<sub>6</sub>], Li[FSA], Li[TFSA] as salts and SL, PC, EC:DMC as solvents in the first (a) and second (b) cycle.
